# Supplementary material for: Piezoelectric energy harvesting from a PMN–PT single nanowire
Source: Royal Society of Chemistry journal article supplement (doi:10.1039/c6ra24688e), 2016-12-24
Supplement: c6ra24688e1.pdf [file c6ra24688e1.pdf]

## Electronic Supplementary Information for:

### Piezoelectric energy harvesting from a PMN-PT single nanowire

---

Brindha Moorthy<sup>a, ‡</sup>, Changyeon Baek<sup>a, ‡</sup>, Ji Eun Wang<sup>a</sup>, Chang Kyu Jeong<sup>a, b</sup>, San Moon<sup>a</sup>,  
Kwi-Il Park<sup>c, \*</sup>, and Do Kyung Kim<sup>a, \*</sup>

<sup>a</sup> Department of Materials Science and Engineering, Korea Advanced Institute of Science and Technology (KAIST), 291 Daehak-ro, Yuseong-gu, Daejeon, 34141, Republic of Korea

<sup>b</sup> KAIST Institute for the NanoCentury (KINC), 291 Daehak-ro, Yuseong-gu, Daejeon, 34141, Republic of Korea.

<sup>c</sup> Department of Energy Engineering, Gyeongnam National University of Science and Technology (GNTECH), 33 Dongjin-ro, Jinju-si, Gyeongsangnam-do, 52725, Republic of Korea

<sup>‡</sup>Equal contributors

\*CORRESPONDING AUTHORS

**Kwi-Il Park\***

E-mail: kipark@gntech.ac.kr, (Phone) +82-55-751-3884, (Fax) +82-55-751-3889

**Do Kyung Kim\***

E-mail: dkkim@kaist.ac.kr, (Phone) +82-42-350-4118, (Fax) +82-42-350-3310

---

**This PDF file includes:**

Figures S1

## 1. Output performance of an energy harvester based on PMN-PT nanowires – PDMS composite

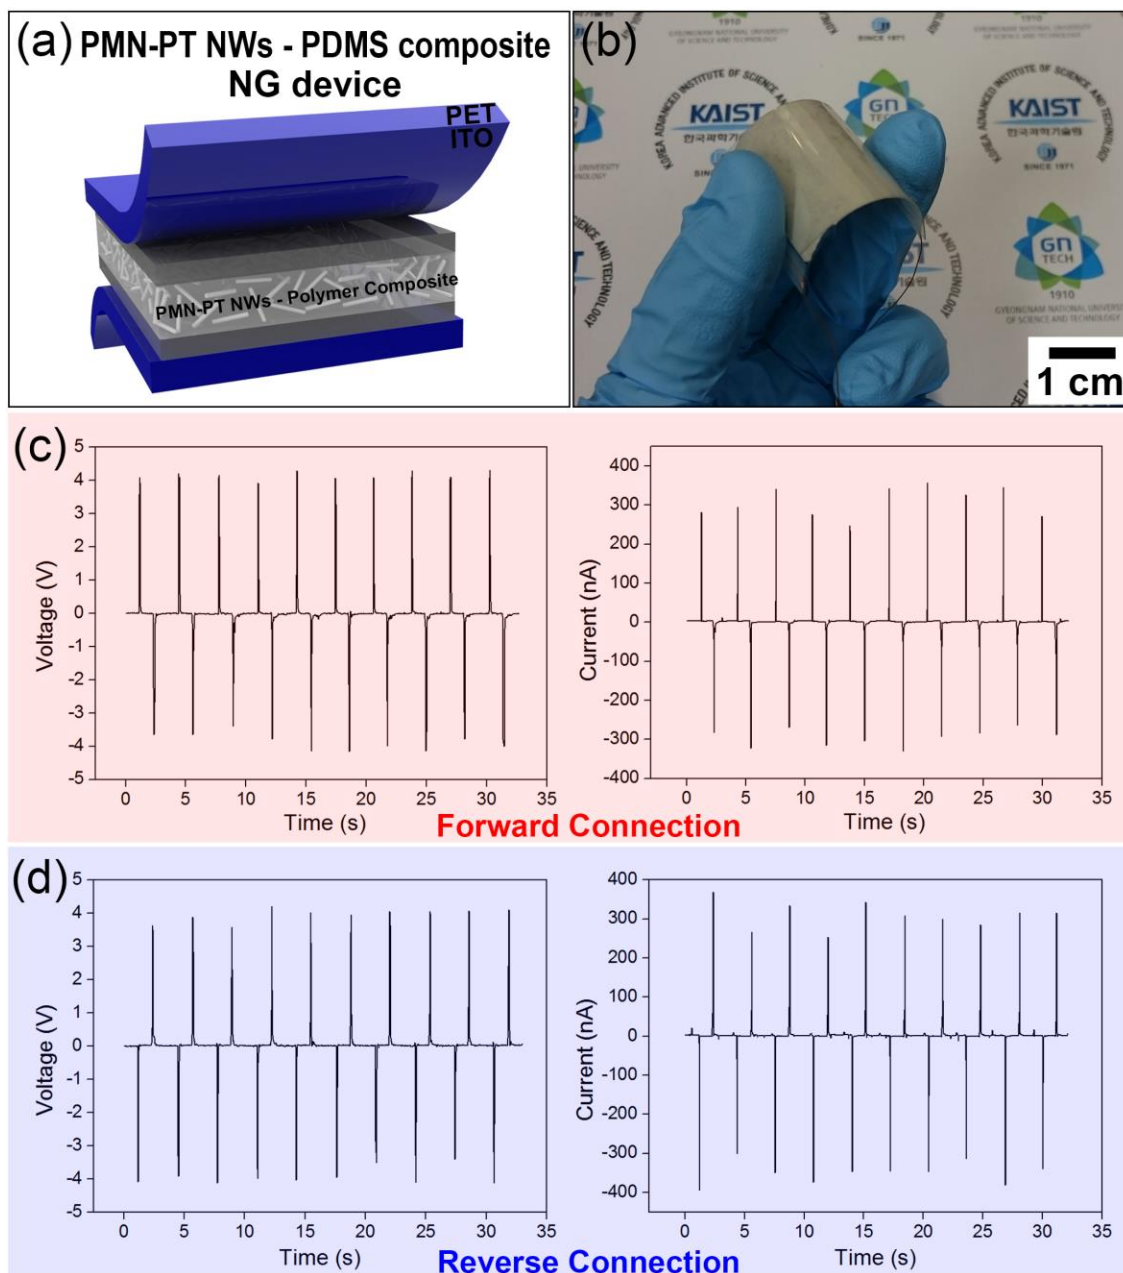

**Fig. S1** (a) Schematic diagram of the NCG device based on PMN-PT NWs. (b) Photograph of the NCG device (3 x 3 cm<sup>2</sup>) completely bent by a human finger, which demonstrates its flexibility. Electrical output performance of the NCG device when subjected to repeated bending/unbending motions. Open-circuit voltage and short-circuit current under forward connection (c) and reverse connection (d).
